# Supplementary material for: Solubility Data, Solubility Parameters and Thermodynamic Behavior of an Antiviral Drug Emtricitabine in Different Pure Solvents: Molecular Understanding of Solubility and Dissolution
Source: PubMed Central journal article supplement (PMC7867001; doi:10.3390/molecules26030746), 2021-01-31
Supplement: molecules-26-00746-s001.pdf [file molecules-26-00746-s001.pdf]

## **Supporting information**

### **Solubility Data, Solubility Parameters and Thermodynamic Behavior of an Antiviral Drug Emtricitabine in Different Pure Solvents: Molecular Understanding of Solubility and Dissolution**

**Faiyaz Shakeel, Nazrul Haq, Ibrahim A. Alsarra and Sultan Alshehri\***

Department of Pharmaceutics, College of Pharmacy, King Saud University, P.O. Box: 2457, Riyadh 11451, Saudi Arabia; [faiyazs@fastmail.fm](mailto:faiyazs@fastmail.fm) (F.S.), [nazrulhaq59@gmail.com](mailto:nazrulhaq59@gmail.com) (N.H.), [ialsarra@ksu.edu.sa](mailto:ialsarra@ksu.edu.sa) (I.A.)

\* Correspondence: [salshehri1@ksu.edu.sa](mailto:salshehri1@ksu.edu.sa) (S.A.)

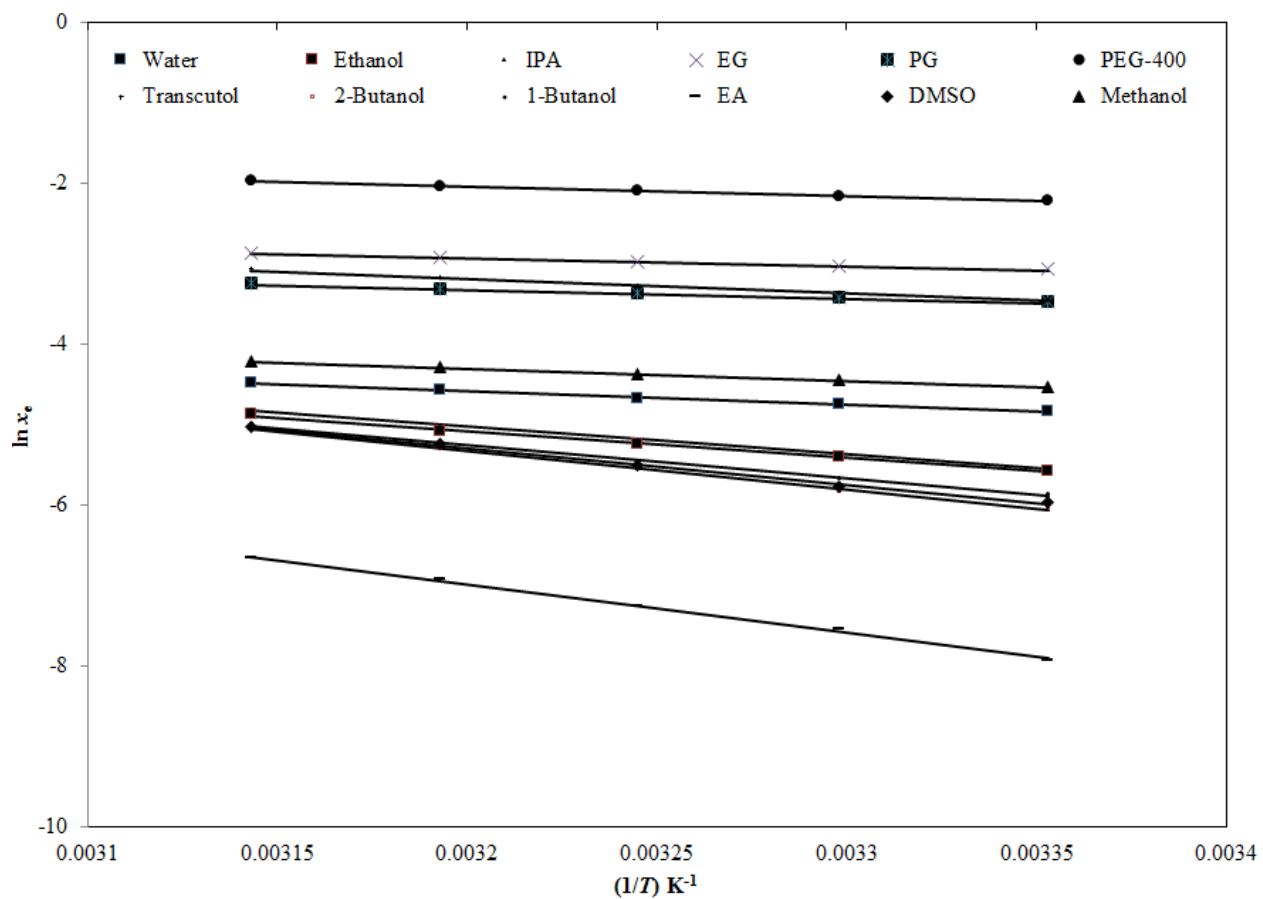

**Figure S1.** Correlation of experimental natural logarithmic solubilities ( $\ln x_e$ ) of emtricitabine (ECT) with “van’t Hoff model” in various pure solvents (*PS*) as a function of  $1/T$ ; symbols represent the experimental  $\ln x_e$  values of ECT and the solid lines represent the  $\ln x^{\text{van't}}$  values calculated by “van’t Hoff model”.

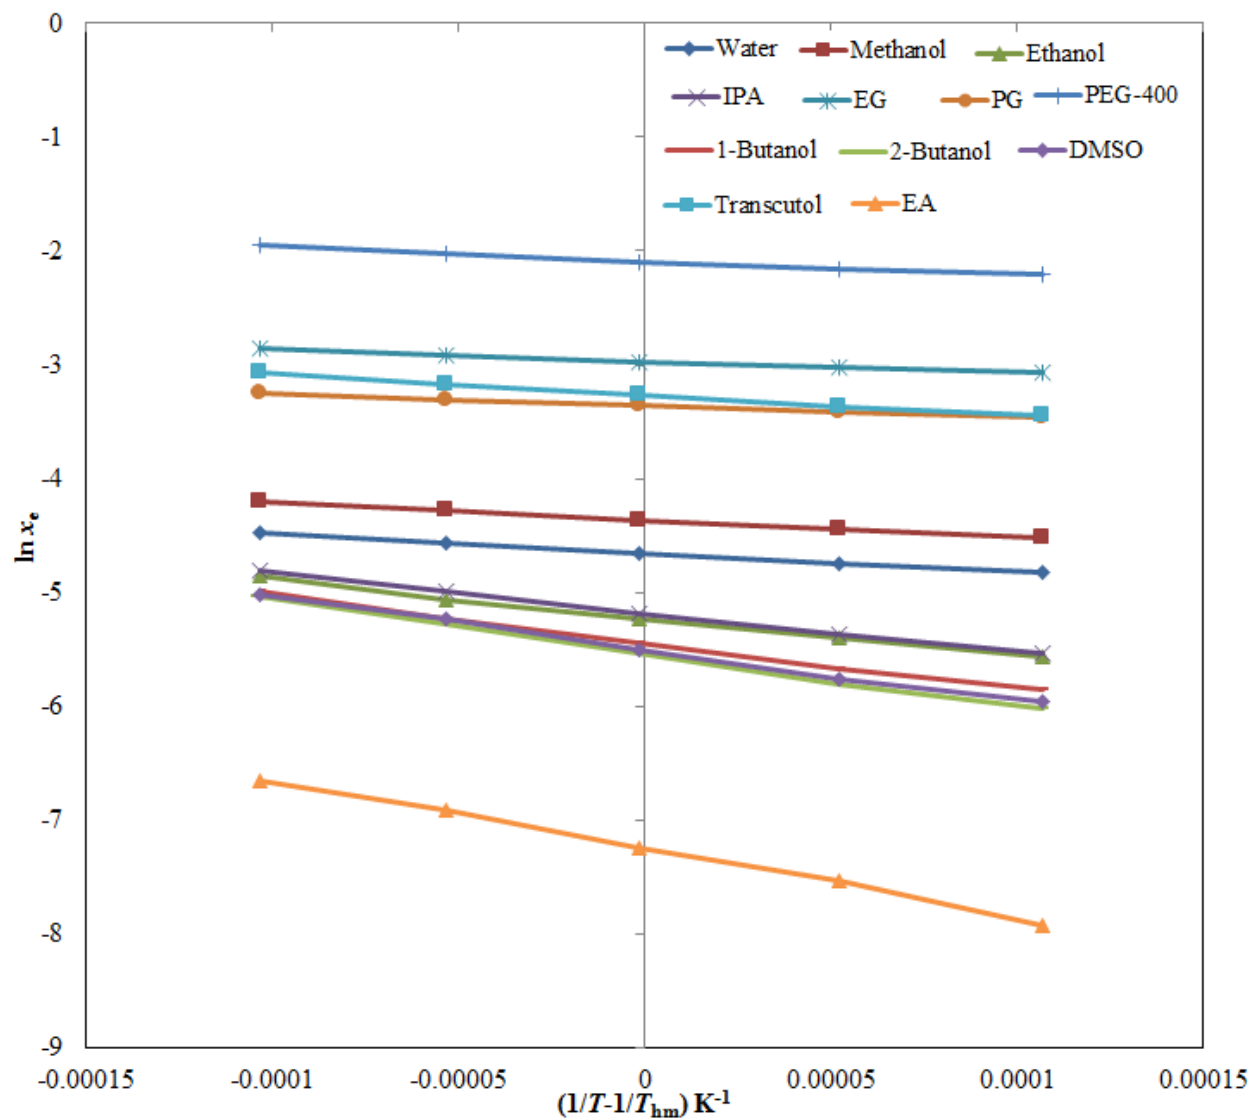

Figure S2. van't Hoff plots for ECT plotted between  $\ln x_e$  and  $1/T - 1/T_{hm}$  for ECT in various PS.

**Table S1:** List of materials and their properties.

| Material   | Molecular formula                                               | Molar mass (g mol <sup>-1</sup> ) | CAS Registry no. | Purification method | Mass fraction purity | Analysis method | Source        |
|------------|-----------------------------------------------------------------|-----------------------------------|------------------|---------------------|----------------------|-----------------|---------------|
| ECT        | C <sub>8</sub> H <sub>10</sub> FN <sub>3</sub> O <sub>3</sub> S | 247.24                            | 143491-57-0      | None                | >0.98                | HPLC            | Sigma Aldrich |
| Methanol   | CH <sub>3</sub> OH                                              | 32.04                             | 67-56-1          | None                | >0.99                | GC              | Sigma Aldrich |
| Ethanol    | C <sub>2</sub> H <sub>5</sub> OH                                | 46.07                             | 64-17-5          | None                | >0.99                | GC              | Sigma Aldrich |
| EG         | C <sub>2</sub> H <sub>6</sub> O <sub>2</sub>                    | 62.07                             | 107-21-1         | None                | >0.99                | GC              | Fluka Chemica |
| Transcutol | C <sub>6</sub> H <sub>14</sub> O <sub>3</sub>                   | 134.17                            | 111-90-0         | None                | >0.99                | GC              | Gattefosse    |
| PG         | C <sub>3</sub> H <sub>8</sub> O <sub>2</sub>                    | 76.09                             | 57-55-6          | None                | >0.99                | GC              | Fluka Chemica |
| PEG-400    | H(OCH <sub>2</sub> CH <sub>2</sub> ) <sub>n</sub> OH            | 400                               | 25322-68-3       | None                | >0.99                | HPLC            | Fluka Chemica |
| IPA        | C <sub>3</sub> H <sub>8</sub> O                                 | 60.10                             | 67-63-0          | None                | >0.99                | GC              | Sigma Aldrich |
| 1-Butanol  | C <sub>4</sub> H <sub>10</sub> O                                | 74.12                             | 71-36-3          | None                | >0.99                | GC              | Sigma Aldrich |
| 2-Butanol  | C <sub>4</sub> H <sub>10</sub> O                                | 74.12                             | 78-92-2          | None                | >0.99                | GC              | Sigma Aldrich |
| DMSO       | C <sub>2</sub> H <sub>6</sub> OS                                | 78.13                             | 67-68-5          | None                | >0.99                | GC              | Fluka Chemica |
| EA         | C <sub>4</sub> H <sub>8</sub> O <sub>2</sub>                    | 88.11                             | 141-78-6         | None                | >0.99                | GC              | Fluka Chemica |
| Water      | H <sub>2</sub> O                                                | 18.07                             | 7732-18-5        | None                | -                    | -               | Milli-Q       |

Both the analysis method and purity were provided by supplier of each material.
